# Supplementary material for: Sex and Race Differences in the Utilization and Outcomes of Coronary Artery Bypass Grafting Among Medicare Beneficiaries, 1999–2014
Source: PubMed Central journal article supplement — J Am Heart Assoc. 2018 Jul 12;7(14):e009014. doi: 10.1161/JAHA.118.009014 (PMC6064835; doi:10.1161/jaha.118.009014), 2018-07-12

# **SUPPLEMENTAL MATERIAL**

**Figure S1.** Annual change in the baseline characteristics of women, men, black patients, white patients and patients of other races.

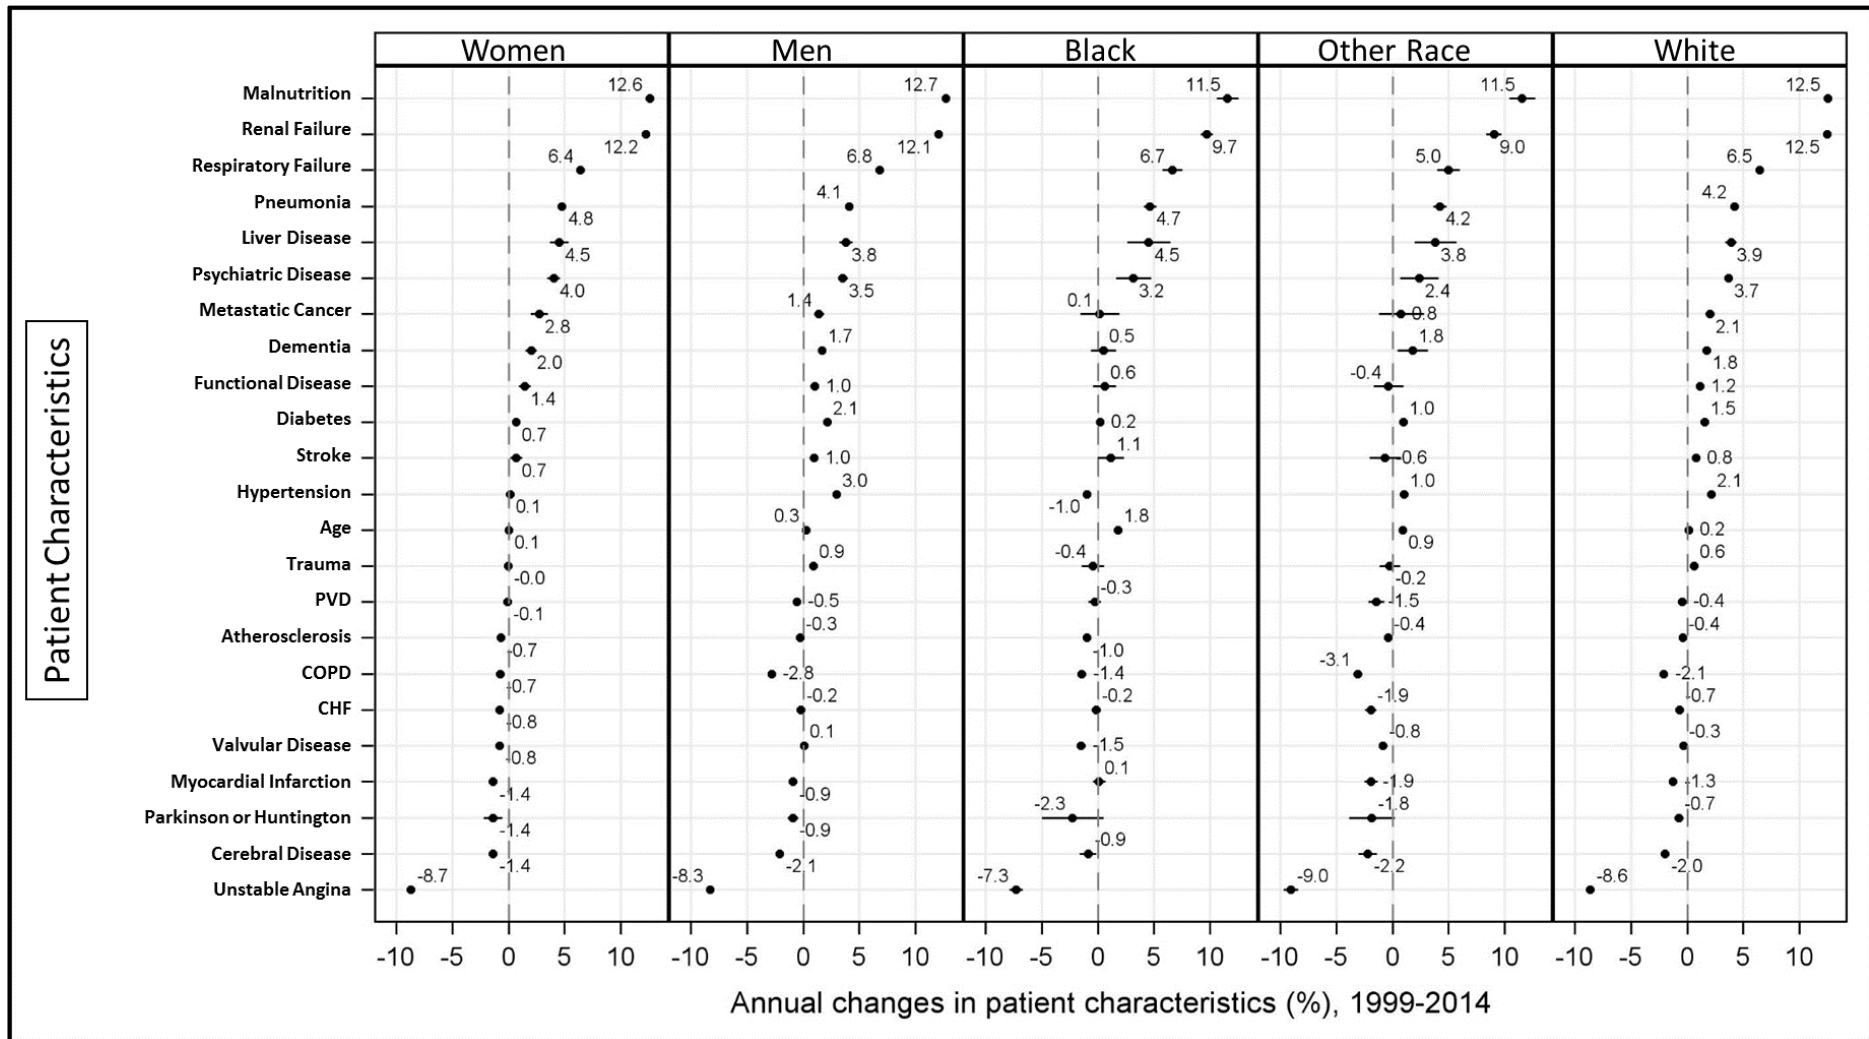

PVD, Peripheral Vascular Disease; COPD, Chronic Obstructive Pulmonary Disease; CHF, Congestive Heart Failure

**Figure S2.** In-hospital Mortality Rates in Patients undergoing CABG by Sex and Race from 1999 to 2014.

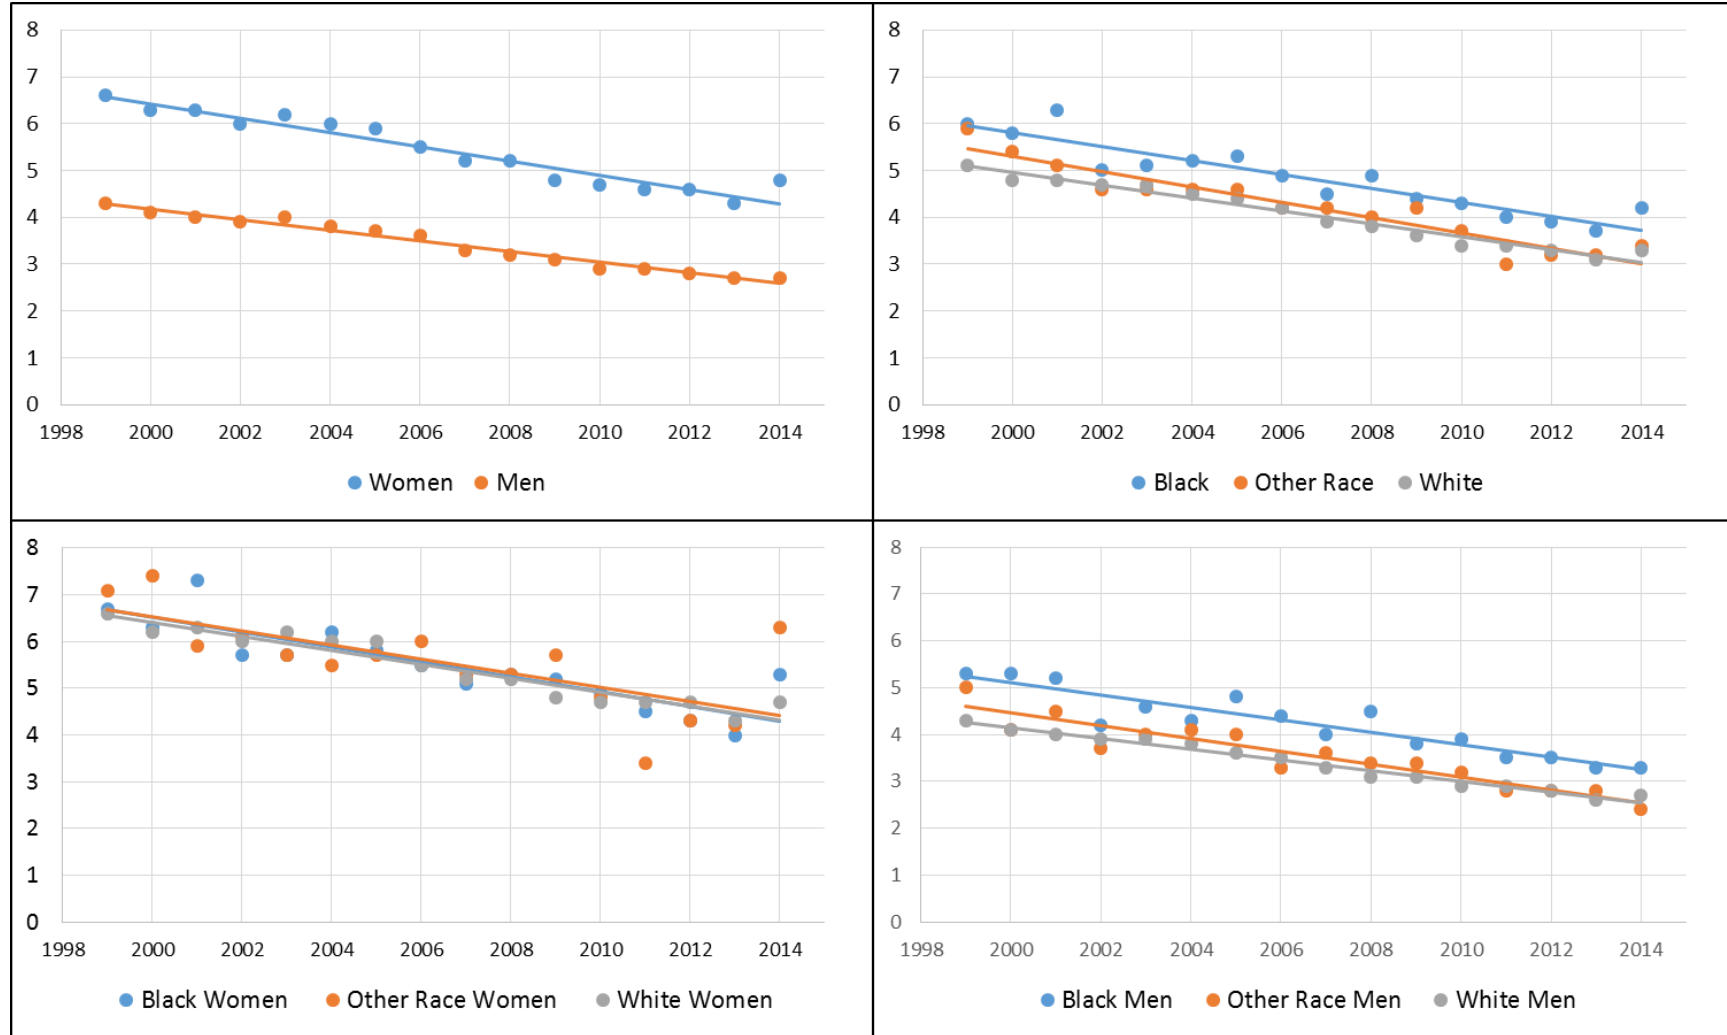

**Figure S3.** 30-day Mortality Rates in Patients undergoing CABG by Sex and Race from 1999 to 2014.

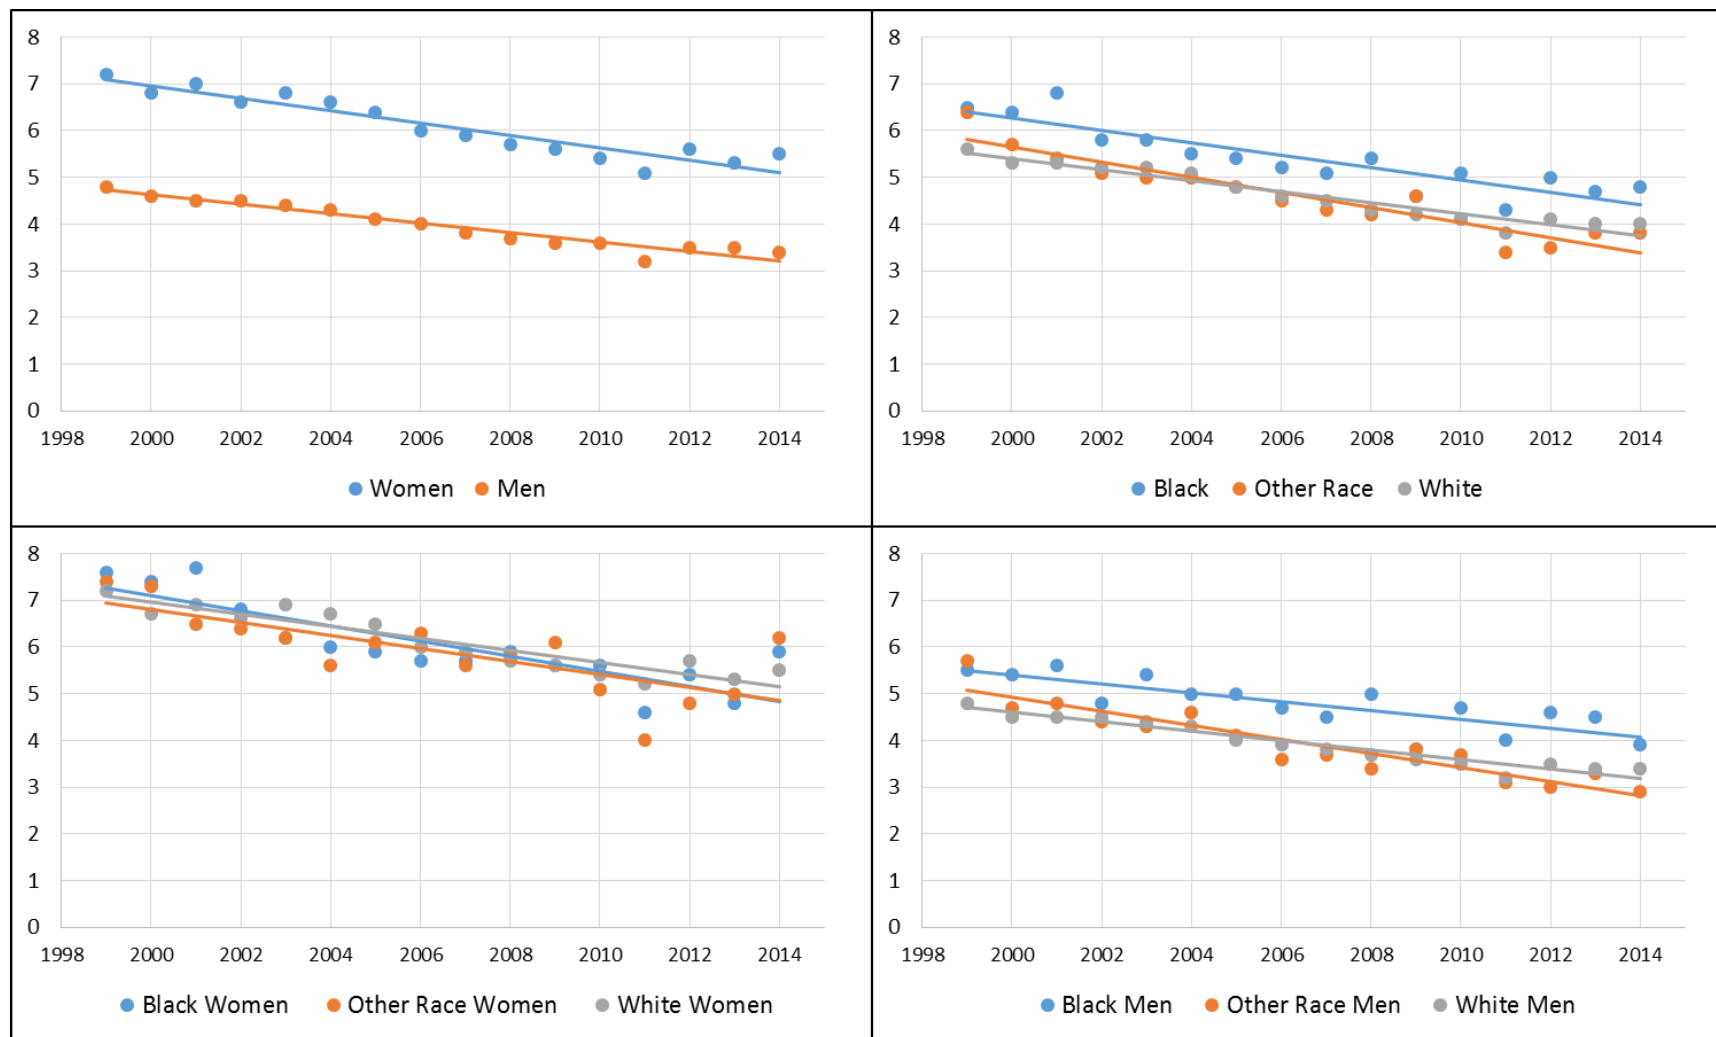

**Figure S4.** 1-year Mortality Rates in Patients undergoing CABG by Sex and Race from 1999 to 2014.

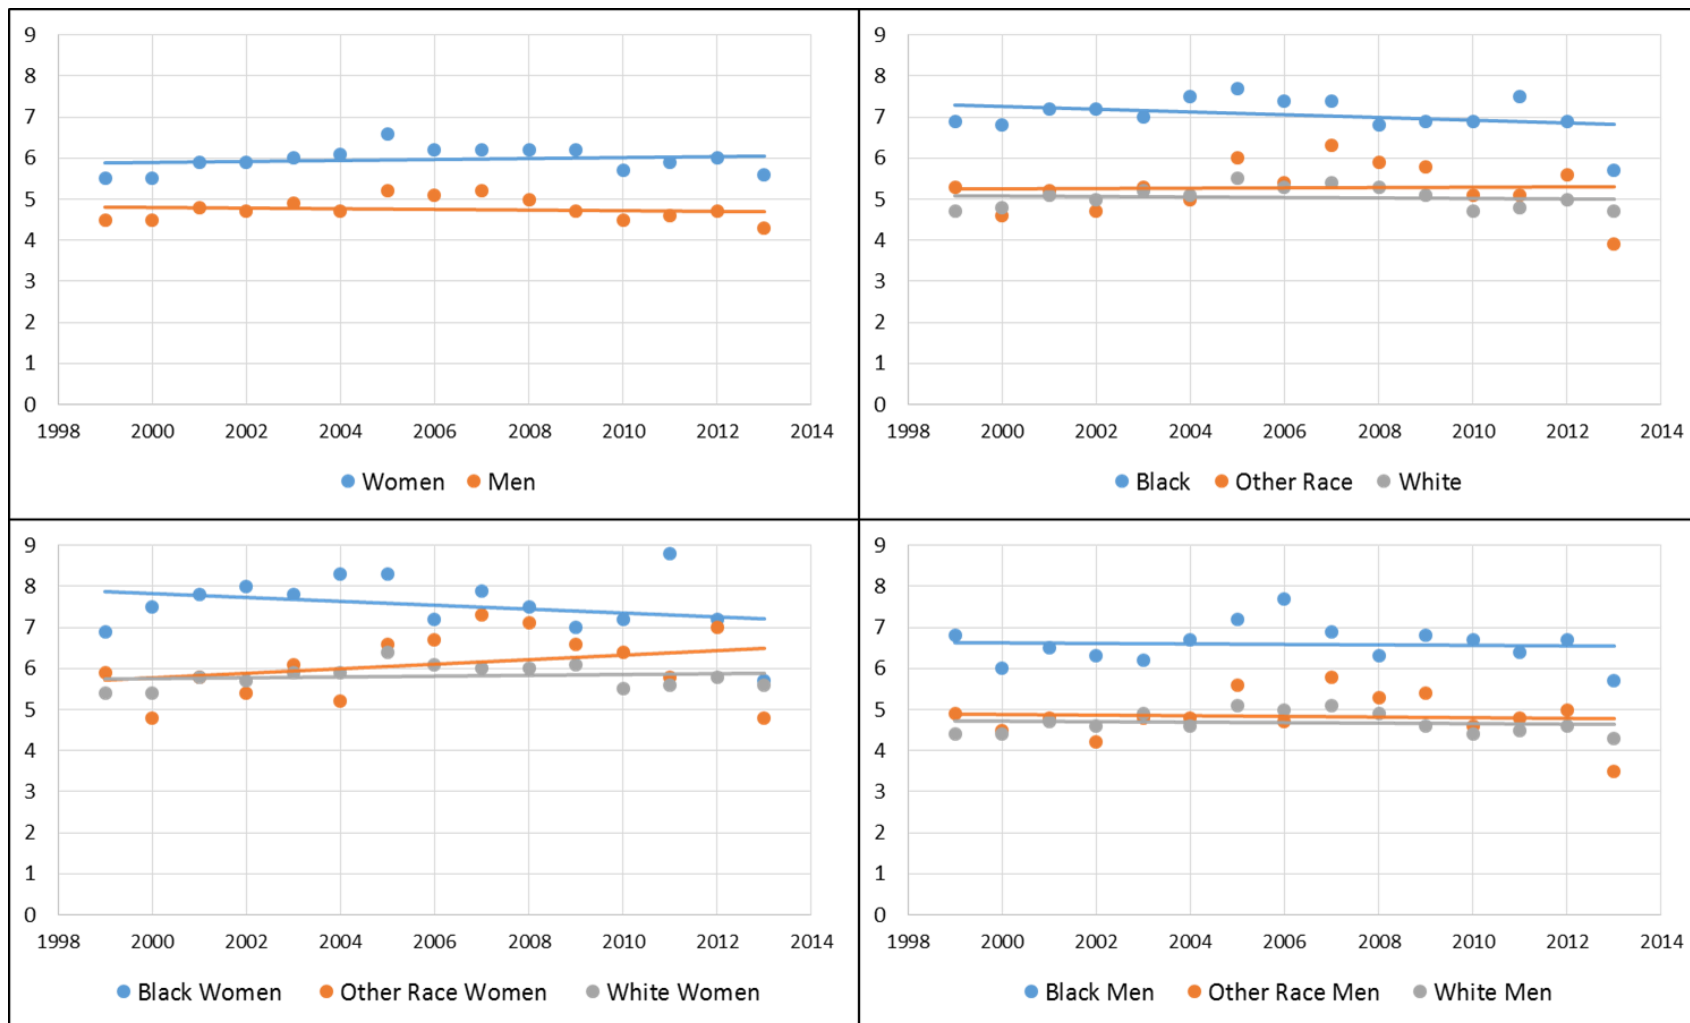

**Figure S5.** 30-day Readmission Rates in Patients undergoing CABG by Sex and Race from 1999 to 2014.

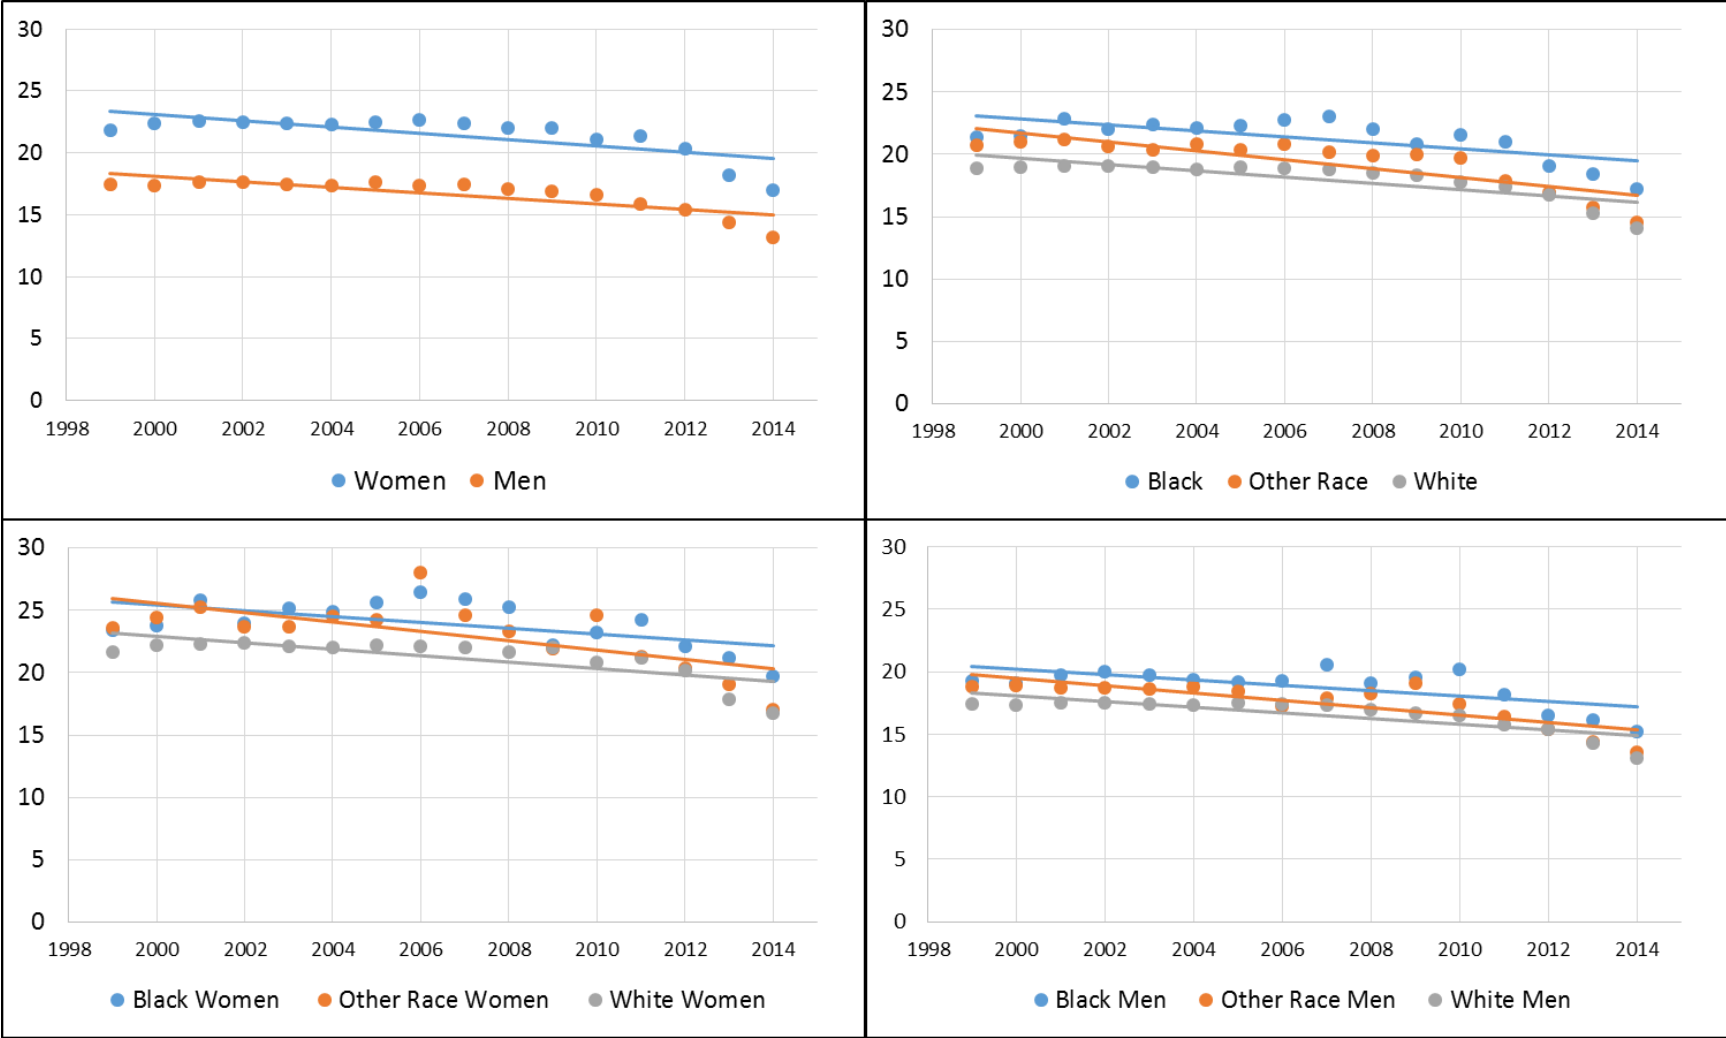

Supplement: JAH3-7-e009014-s001.pdf [file JAH3-7-e009014-s001.pdf]
